# Supplementary material for: Biotite: new tools for a versatile Python bioinformatics library
Source: Springer Nature journal article supplement (doi:10.1186/s12859-023-05345-6), 2023-06-05
Supplement: 12859_2023_5345_MOESM4_ESM.pdf [file 12859_2023_5345_MOESM4_ESM.pdf]

## Supplementary benchmarks

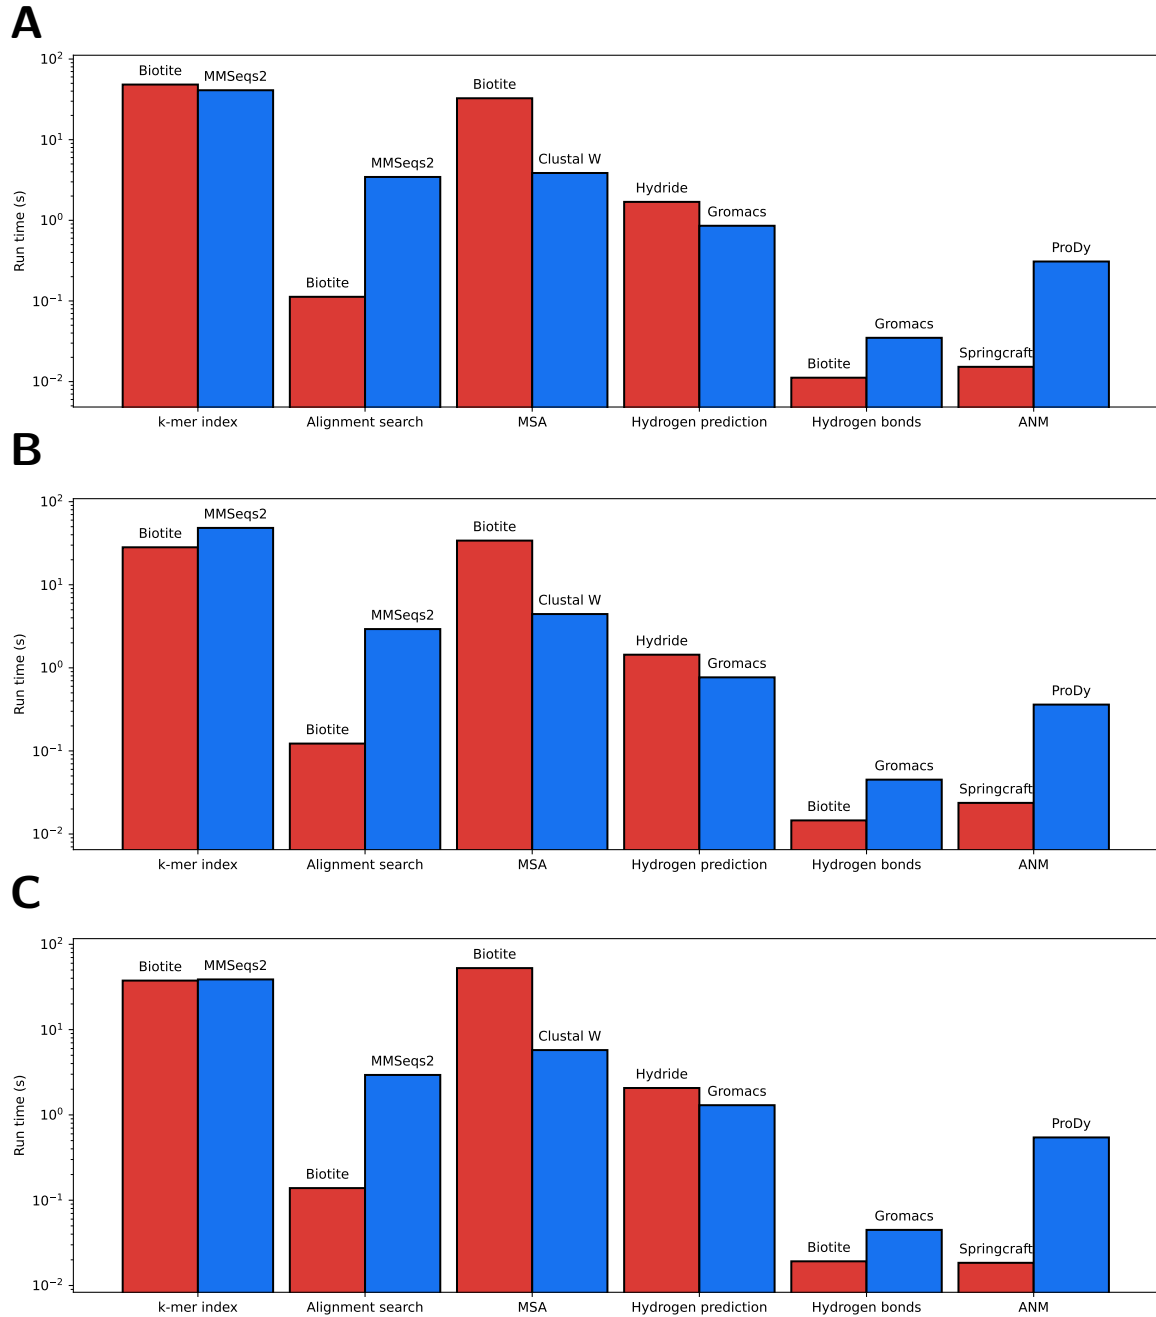

The shown benchmarks were conducted for the same tasks as described in Figure 7 of the main article on different machines.

**A** Intel® Core™ i7-8565U (1.8 GHz).

**B** Intel® Xeon® Gold 6148 CPU (2.4 GHz).

**C** AMD Ryzen™ 7 1700X (3.4 GHz).
